# Supplementary material
Source: PubMed Central journal article supplement (PMC7587084)
Supplement: JCM.01563-20-s0001.pdf [file JCM.01563-20-s0001.pdf]

1 **Supplemental Table 1.** Baseline characteristics of PLWH with cryptococcosis by positivity of serum  
 2 cryptococcal antigen testing 2002 – 2019 (n=86)

|                                                                                  | <b>Positive Serum CrAg (n=82)</b> | <b>Negative Serum CrAg (n=4)</b> | <b>p-values</b> |
|----------------------------------------------------------------------------------|-----------------------------------|----------------------------------|-----------------|
| <b>Male</b>                                                                      | 69                                | 4                                | 0.387           |
| <b>Age, years (median, IQR)</b>                                                  | 38.9 (31.7, 46.1)                 | 44.3 (38.6, 52.2)                | 0.211           |
| <b>African American</b>                                                          | 61                                | 4                                | 0.983           |
| <b>Site of Infection</b>                                                         |                                   |                                  |                 |
| <i>Pulmonary</i>                                                                 | 7 (8.5)                           | 0 (0)                            | 0.542           |
| <i>CNS disease</i>                                                               | 59 (72)                           | 3 (75)                           | 0.894           |
| <i>Bloodstream</i>                                                               | 57 (69.8)                         | 3 (75)                           | 0.815           |
| <i>Other Infection</i>                                                           | 3 (3.7)                           | 1 (25)                           | 0.048           |
| <b>90-day mortality</b>                                                          | 11 (13.4)                         | 0 (0)                            | 0.433           |
| <b>Time to diagnosis from symptom onset, median (days, IQR)</b>                  | 14 (4, 28)                        | 15.5 (10, 21.7)                  | 0.743           |
| <b>Time to initiation of antifungals from symptom onset, median (days, IQR)</b>  | 14 (5, 27)                        | 16 (10.2, 21.7)                  | 0.694           |
| <b>Time to initiation of antifungals from admission date, median (days, IQR)</b> | 1 (0.2, 6.2)                      | 1 (0, 2)                         | 0.632           |

3 Abbreviations: PLWH – people living with HIV; CrAg – cryptococcal antigen; IQR – interquartile range;  
 4 CNS – central nervous system

5

6

7 **Supplemental Table 2.** Baseline characteristics of HIV-negative individuals with localized pulmonary  
 8 cryptococcosis by positivity of serum cryptococcal antigen testing 2002 – 2019 (n=45)

|                                                                                  | <b>Positive Serum CrAg (n=18)</b> | <b>Negative Serum CrAg (n=27)</b> | <b>p-values</b> |
|----------------------------------------------------------------------------------|-----------------------------------|-----------------------------------|-----------------|
| <b>Male</b>                                                                      | 11 (61)                           | 21 (78)                           | 0.227           |
| <b>Age, years (median, IQR)</b>                                                  | 59 (45, 71)                       | 59 (52, 71)                       | 0.592           |
| <b>African American</b>                                                          | 2 (11)                            | 1 (4)                             | 0.107           |
| <b>Transplant Recipients</b>                                                     | 5 (28)                            | 5 (19)                            | 0.464           |
| <b>Immunocompetent</b>                                                           | 6 (33)                            | 12 (44)                           | 0.456           |
| <b>90-day mortality</b>                                                          | 4 (22)                            | 7 (26)                            | 0.777           |
| <b>Time to diagnosis from symptom onset, median (days, IQR)</b>                  | 24 (13, 77)                       | 14 (5, 27)                        | 0.112           |
| <b>Time to initiation of antifungals from symptom onset, median (days, IQR)</b>  | 45 (22, 70)                       | 27 (14, 42)                       | 0.821           |
| <b>Time to initiation of antifungals from admission date, median (days, IQR)</b> | 3 (2, 7)                          | 13 (4, 26)                        | 0.042           |

9 Abbreviations: CrAg – cryptococcal antigen; IQR – interquartile range; CNS – central nervous system

10

11

12

13
